# Supplementary material
Source: ML conference proceedings conference paper supplement (https://openreview.net/forum?id=HNlzT3G720t)

Original ( $y = \textit{castle}$ )

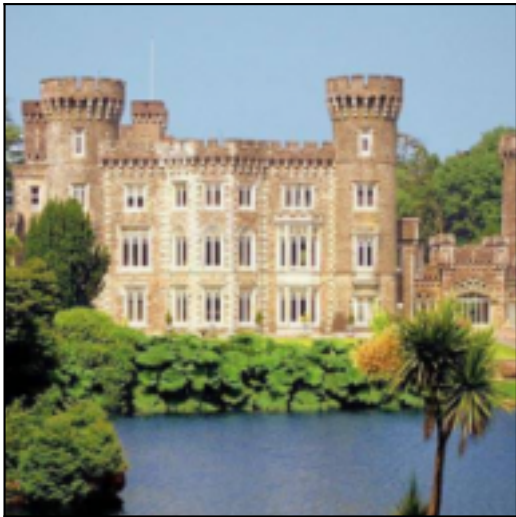

Shape ( $\hat{y} = \textit{platerack}$ )

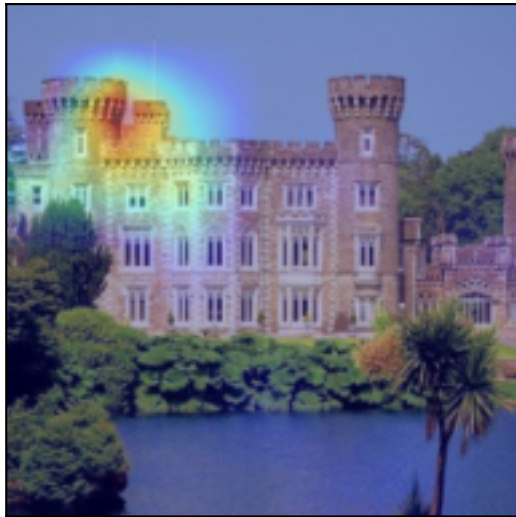

Texture ( $\hat{y} = \textit{palace}$ )

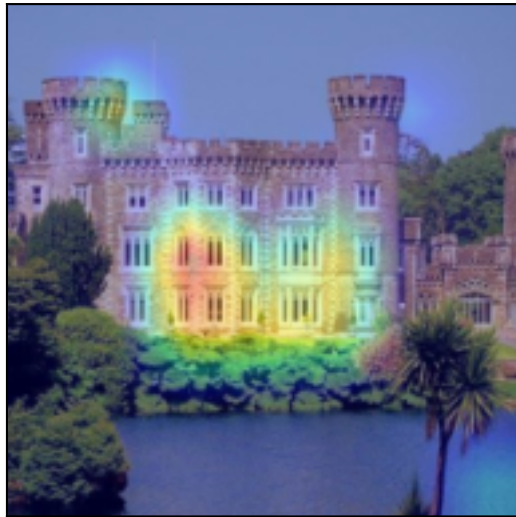

Background ( $\hat{y} = \textit{castle}$ )

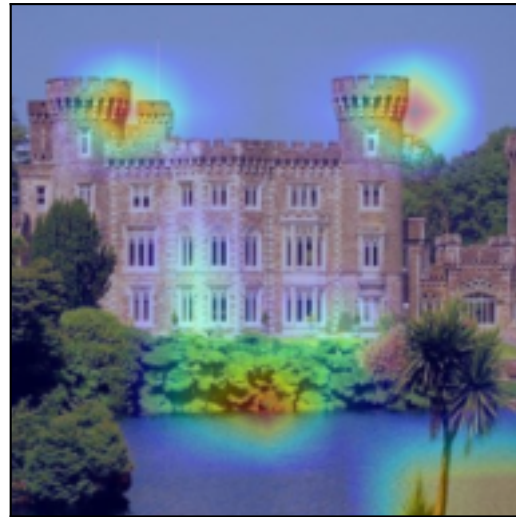

Average ( $\hat{y} = \textit{castle}$ )

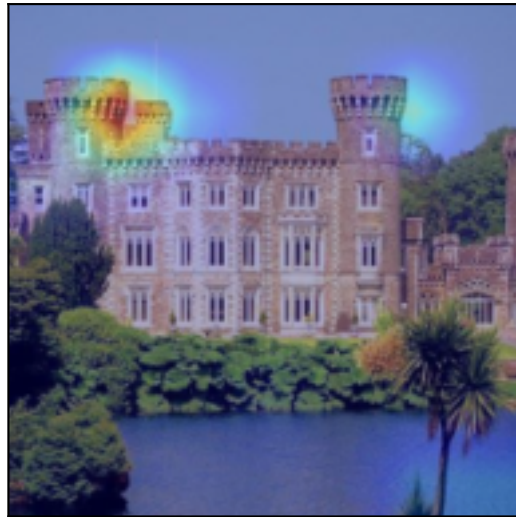

Supplement: supplementary_material [file attachment]
