# Supplementary material
Source: ML conference proceedings conference paper supplement (https://openreview.net/forum?id=HNlzT3G720t)

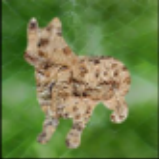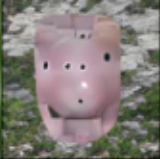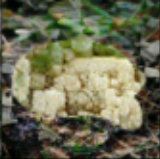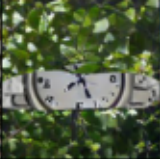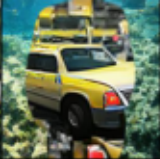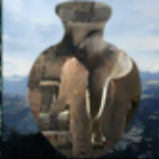

Supplement: supplementary_material [file attachment]

colored\_MNIST: Original

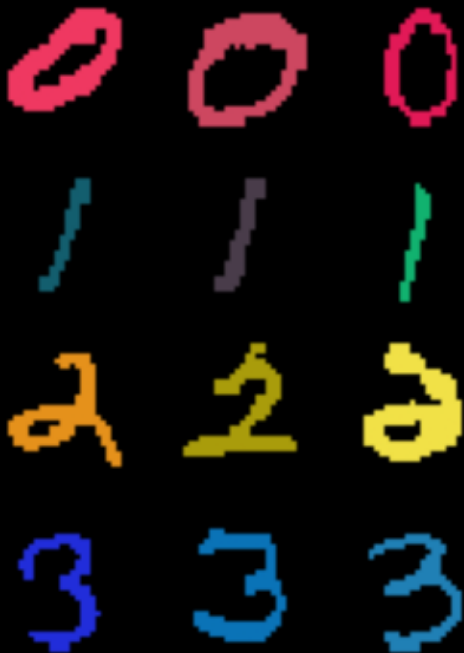

Supplement: supplementary_material [file attachment]

wildlife\_MNIST: Original

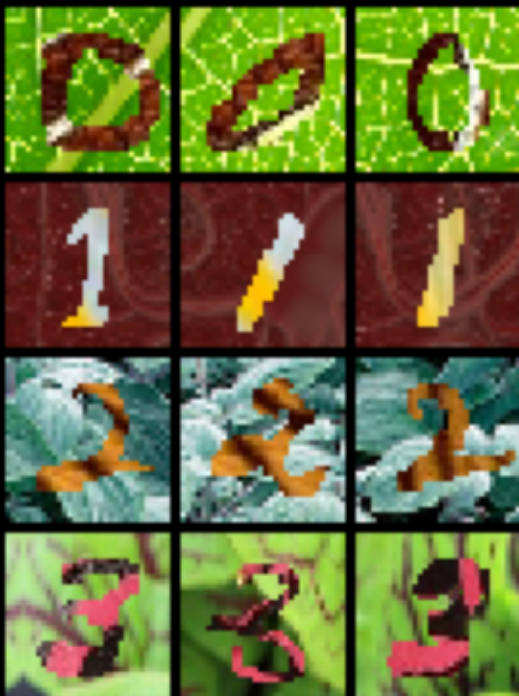

Supplement: supplementary_material [file attachment]

double\_colored\_MNIST: Original

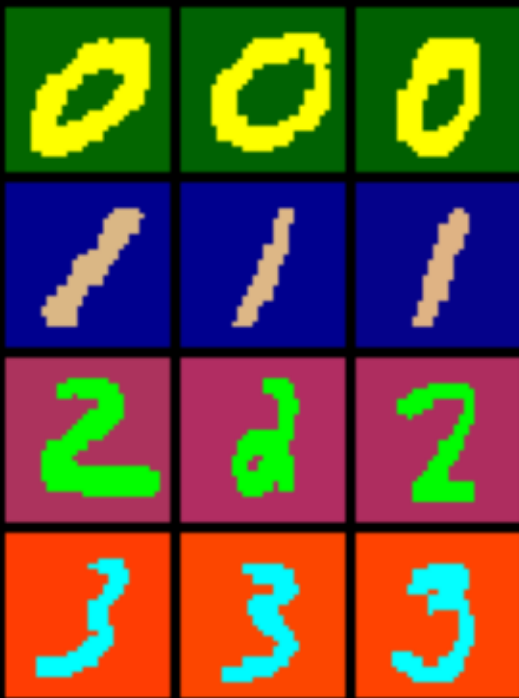

Supplement: supplementary_material [file attachment]

double\_colored\_MNIST: Counterfactual

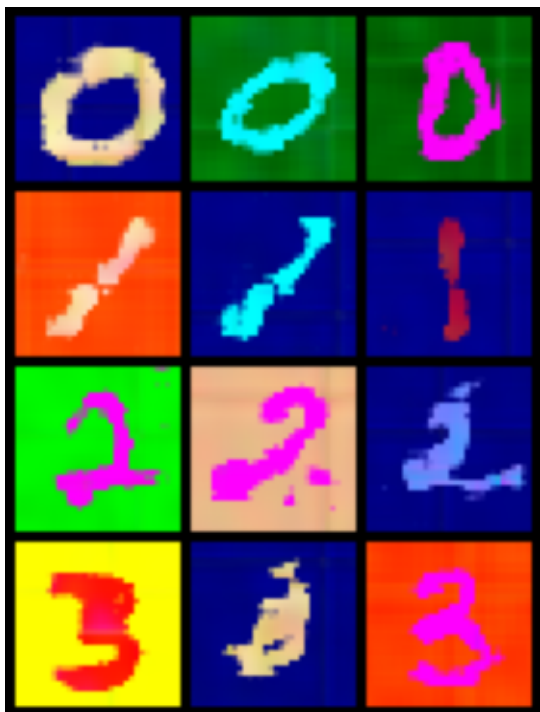

Supplement: supplementary_material [file attachment]

wildlife\_MNIST: Counterfactual

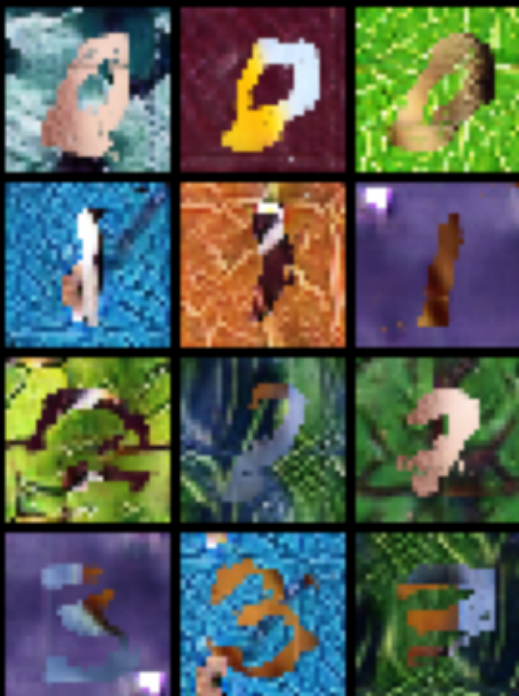

Supplement: supplementary_material [file attachment]

colored\_MNIST: Counterfactual

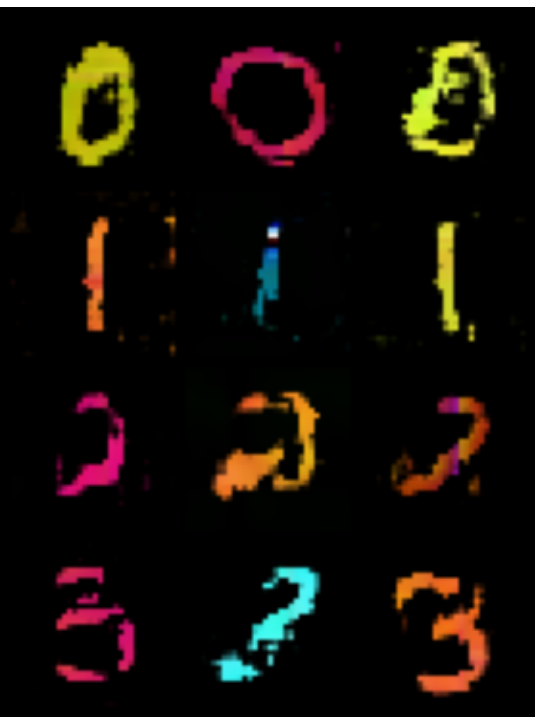

Supplement: supplementary_material [file attachment]
